# Supplementary material for: Two Sweet Sorghum (Sorghum bicolor L.) WRKY Transcription Factors Promote Aluminum Tolerance via the Reduction in Callose Deposition
Source: MDPI journal article supplement (doi:10.3390/ijms241210288), 2023-06-17
Supplement: s1 [file s1]

**A**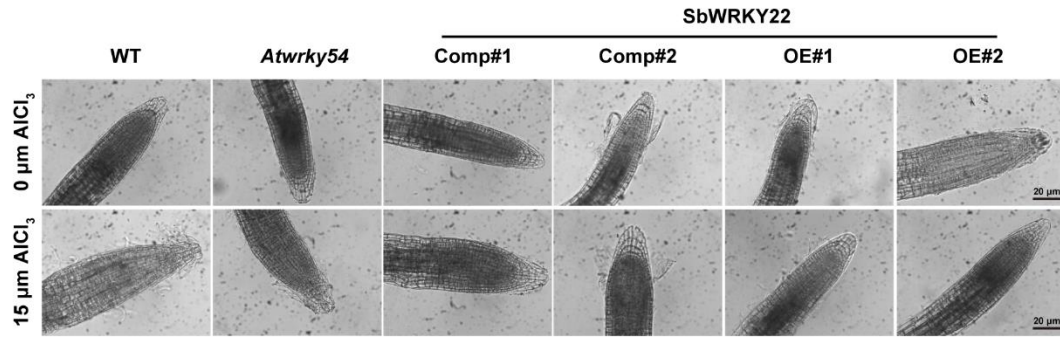**B**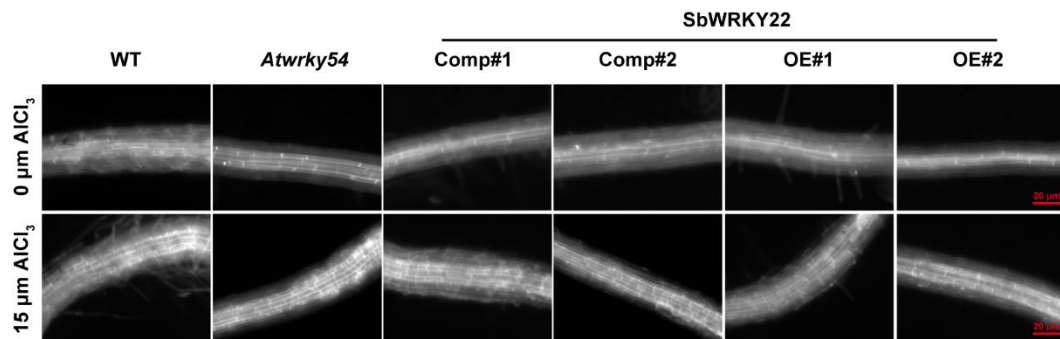

**Figure S1.** Effects of overexpression of *SbWRKY22* in transgenic *Arabidopsis* on root morphology and callose deposition under Al stress. **(A)** The root morphology of WT (Col-0), *Atwrky54* mutant and the transgenic lines. Seven-day-old seedlings were pre-cultured on a solid MS medium vertically, then transferred to a liquid medium containing 0.5 mM  $\text{CaCl}_2$  at pH 5.0 with 15  $\mu\text{M}$   $\text{AlCl}_3$  or not for 24 h. Scale bar, 20  $\mu\text{m}$ . **(B)** Aniline blue staining of callose in root tips. Callose deposition in the roots of WT (Col-0), *Atwrky54* mutant and the transgenic lines with 15  $\mu\text{M}$   $\text{AlCl}_3$  or not for 6 h. Callose localization was performed using root tips, stained for 5 min with an aniline blue solution consisting of 0.1% aniline blue in 1 M glycine at pH 9.5. The root tips were visualized under UV light with an inverted fluorescence microscope. Scale bar, 20  $\mu\text{m}$ .

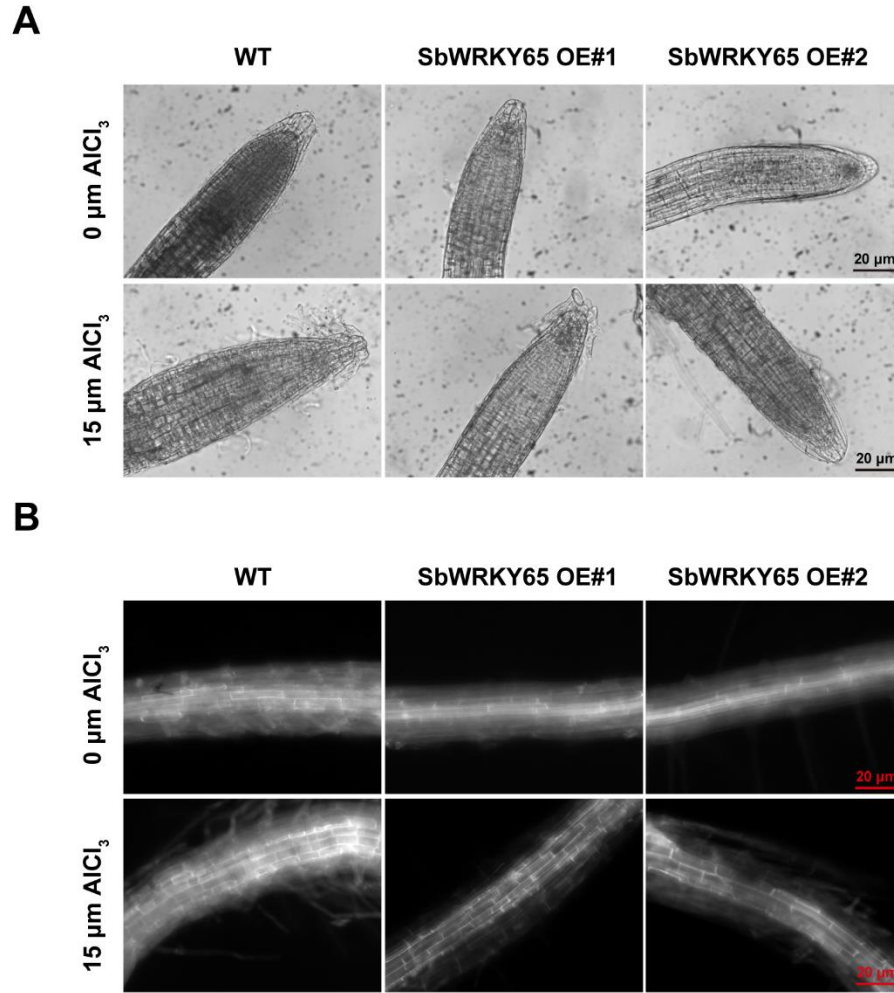

**Figure S2.** Effects of overexpression of *SbWRKY65* in transgenic *Arabidopsis* on root morphology and callose deposition under Al stress. **(A)** The root morphology of WT (Col-0) and two independent *SbWRKY65* overexpression lines. Seven-day-old seedlings were pre-cultured on a solid MS medium vertically, then transferred to a liquid medium containing 0.5 mM  $\text{CaCl}_2$  at pH 5.0 with 15  $\mu\text{M}$   $\text{AlCl}_3$  or not for 24 h. Scale bar, 20  $\mu\text{m}$ . **(B)** Aniline blue staining of callose in root tips. Callose deposition patterns in the roots of WT (Col-0) and two independent *SbWRKY65* overexpression lines with 15  $\mu\text{M}$   $\text{AlCl}_3$  or not for 6 h. Callose localization was performed using root tips, stained for 5 min with an aniline blue solution consisting of 0.1% aniline blue in 1 M glycine at pH 9.5. The root tips were visualized under UV light with an inverted fluorescence microscope. Scale bar, 20  $\mu\text{m}$ .

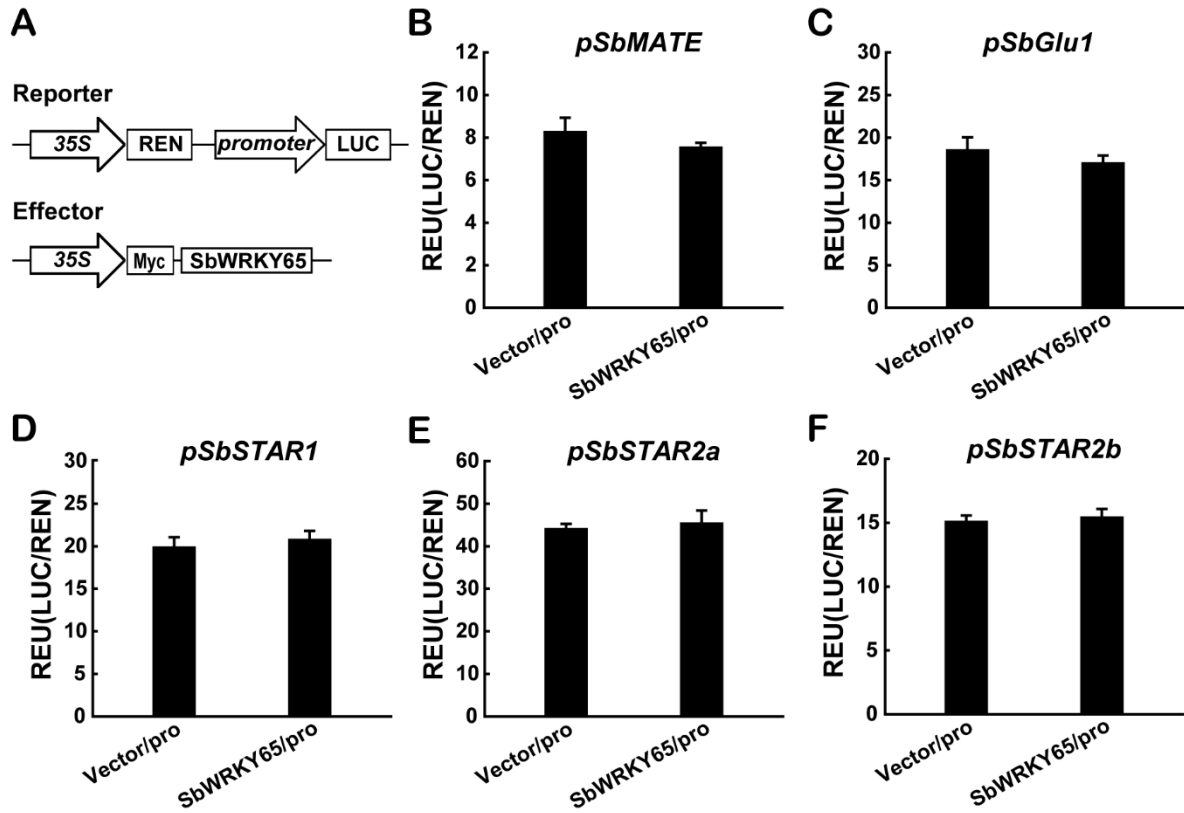

**Figure S3.** Transcriptional characteristic analysis of SbWRKY65. **(A)** Schematic diagram of the reporter and effector used in the dual-luciferase reporter system. *pSbMATE*, *SbMATE* promoter (-2000 bp to -1 bp); *pSbGlu1*, *SbGlu1* promoter (-2000 bp to -1 bp); *pSbSTAR1*, *SbSTAR1* promoter (-1494 bp to -1 bp); *pSbSTAR2a*, *SbSTAR2a* promoter (-1678 bp to -1 bp); *pSbSTAR2b*, *SbSTAR2b* promoter (-1963 bp to -1 bp); LUC, firefly luciferase reporter; REN, *Renilla* luciferase reporter as an internal control; 35S, *CaMV* 35S promoter; Myc, protein tag. **(B, C, D, E, F)** Transcriptional regulation of *SbMATE* **(B)**, *SbGlu1* **(C)**, *SbSTAR1* **(D)**, *SbSTAR2a* **(E)**, and *SbSTAR2b* **(F)** by SbWRKY65. Luciferase activity of the reporter (LUC) driven by the promoters (pro) was normalized to the internal control reporter (REN). Data represent the means  $\pm$  SD from three independent biological replicates.

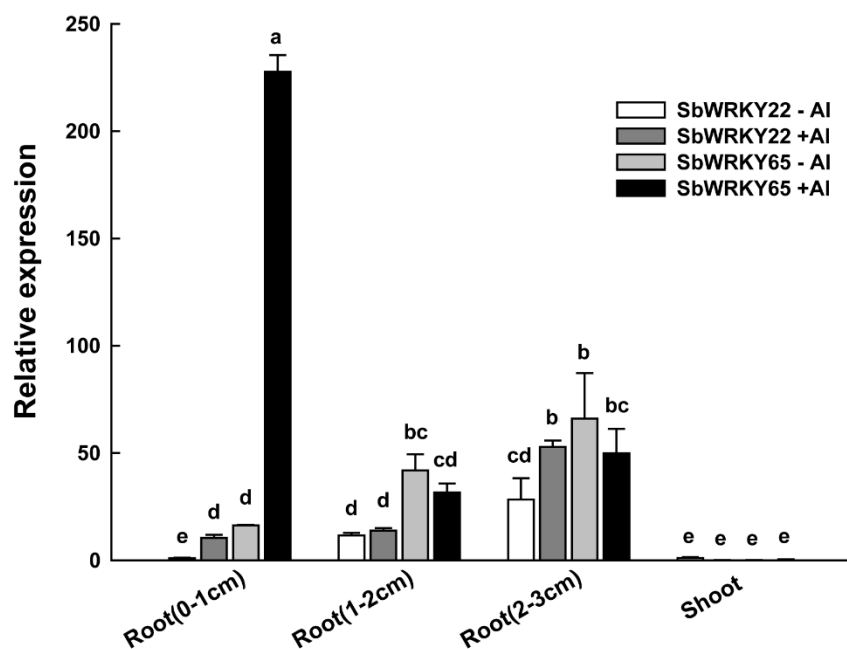

**Figure S4.** Relative expression of *SbWRKY22* and *SbWRKY65* in root and shoot. The expression of *SbWRKY22* in root (0-1 cm) without AI treatment was set as a unified control. Data represent the means  $\pm$  SD from three independent biological replicates. Columns with different letters are significantly different according to Tukey's test ( $P < 0.05$ ).

**Table S1.** Sequences of primers for quantitative real-time PCR.

| <b>Gene</b>     | <b>Primer</b> | <b>Sequence (5'–3')</b> |
|-----------------|---------------|-------------------------|
| <i>SbWRKY22</i> | SbWRKY22-F    | ACCACCAGTGAGCTCAGACT    |
|                 | SbWRKY22-R    | CTGTGCGATCTTCTCCTGGT    |
| <i>SbWRKY65</i> | SbWRKY65-F    | CGCCTTTTCCGAGGGCTTAC    |
|                 | SbWRKY65-R    | CTGTGCTCGAACGAGTAGGT    |
| <i>Sb-actin</i> | Sb-actin-F    | CGACCTTACCGACTACCTCATG  |
|                 | Sb-actin-R    | TCTTGGCAGTCTCCATCTCCT   |
| <i>AtBG2</i>    | AtBG2-F       | CAGCTACATGGGAGACACGG    |
|                 | AtBG2-R       | CACGATTTCCAACGATCCGC    |
| <i>AtWRKY54</i> | AtWRKY54-F    | TGCACTGCCAATGACCAAAC    |
|                 | AtWRKY54-R    | CATGCCTGCGTCTATTGCTG    |
| <i>At-actin</i> | At-actin-F    | GTCTTGTTCCAGCCCTCGT     |
|                 | At-actin-R    | GAGATCCACATCTGCTGGAATG  |

**Table S2.** Sequences of primers for cloning of the constructs.

| Primer                 | Sequence (5'–3')                         |
|------------------------|------------------------------------------|
| pGWB5-SbWRKY22-F       | CAAAAAAGCAGGCTTCATGGCGTCTTCCGCTGGC       |
| pGWB5-SbWRKY22-R       | CAAGAAAGCTGGGTCTCAGGGATCGAAGCCAAACAG     |
| pGWB5-SbWRKY65-F       | CAAAAAAGCAGGCTTCATGGACGCCGAGTGGAGC       |
| pGWB5-SbWRKY65-R       | CAAGAAAGCTGGGTCTCACTTCACCCCGCCG          |
| pEGAD-SbWRKY22-F       | GGCAGCGGCCGAATTCATGGCGTCTTCCGCTGGC       |
| pEGAD-SbWRKY22-R       | CGAGCCCGGGGAATTCTCAGGGATCGAAGCCAAACAG    |
| pEGAD-SbWRKY65-F       | GGCAGCGGCCGAATTCATGGACGCCGAGTGGAGC       |
| pEGAD-SbWRKY65-R       | CGAGCCCGGGGAATTCTCACTTCACCCCGCCG         |
| pGreen0800-pSbMATE-F   | CGGTATCGATAAGCTTCTACAGACTATTAAAGTTGGTTGG |
| pGreen0800-pSbMATE-R   | GGGTCTTGCGCCCGGGGTCGGCCTAGCTACAAACCTT    |
| pGreen0800-pSbGlu1-F   | CGGTATCGATAAGCTTGTCTGTTCTGTATCTACTGTGTCT |
| pGreen0800-pSbGlu1-R   | GGGTCTTGCGCCCGGGTTTGCTCGAACTCGGAGATGT    |
| pGreen0800-pSbSTAR1-F  | CGGTATCGATAAGCTTTTGAACGTCGCTAAATTGTCTTGT |
| pGreen0800-pSbSTAR1-R  | GGGTCTTGCGCCCGGGTATTGGCGGCGGCGG          |
| pGreen0800-pSbSTAR2a-F | CGGTATCGATAAGCTTCATTGACCTGCAGTCCGCG      |
| pGreen0800-pSbSTAR2a-R | GGGTCTTGCGCCCGGGGCCCGCAGCAAGCAGC         |
| pGreen0800-pSbSTAR2b-F | CGGTATCGATAAGCTTACTTCAGGGACTGCGAAAGC     |
| pGreen0800-pSbSTAR2b-R | GGGTCTTGCGCCCGGGCACCGACCGGCCCGTAC        |
| pGreen0800-pSbWRKY22-F | CGGTATCGATAAGCTTGTTAAGAAATGACTTATGTTCTCC |
| pGreen0800-pSbWRKY22-R | GGGTCTTGCGCCCGGGGCCCGCTTGCTAGCTATCT      |

**Table S2.** Sequences of primers for cloning of the constructs (Continued).

| Primer               | Sequence (5'–3')                           |
|----------------------|--------------------------------------------|
| pJG45-SbWRKY22-F     | TGCCTCTCCCGAATTCATGGCGTCTTCCGCTGGC         |
| pJG45-SbWRKY22-R     | TCCAAAGCTTCTCGAGTCAGGGATCGAAGCCAAACAG      |
| pJG45-SbWRKY65-F     | TGCCTCTCCCGAATTCATGGACGCCGAGTGGAGC         |
| pJG45-SbWRKY65-R     | TCCAAAGCTTCTCGAGTCACTTCACCCCGCCG           |
| pLacZi2u-pSbMATE-F   | TATTGGATCGGAATTCCTACAGACTATTAAAGTTGGTTGG   |
| pLacZi2u-pSbMATE-R   | ATGCCTCGAGGTCGACGTCGGCCTAGCTACAAACCTT      |
| pLacZi2u-pSbGlu1-F   | TATTGGATCGGAATTCGTCTGTTCTGTATCTACTGTGTCT   |
| pLacZi2u-pSbGlu1-R   | ATGCCTCGAGGTCGACTTTGCTCGAACTCGGAGATGT      |
| pLacZi2u-pSbSTAR1-F  | TATTGGATCGGAATTCCTGAACGTTTCGCTAAATTGTCTTGT |
| pLacZi2u-pSbSTAR1-R  | ATGCCTCGAGGTCGACTATTGGCGGCGGCGG            |
| pLacZi2u-pSbSTAR2a-F | TATTGGATCGGAATTCATTGACCTGCAGTCCGCG         |
| pLacZi2u-pSbSTAR2a-R | ATGCCTCGAGGTCGACGCCCCGAGCAAGCAGC           |
| pLacZi2u-pSbSTAR2b-F | TATTGGATCGGAATTCCTTCAGGGACTGCGAAAGC        |
| pLacZi2u-pSbSTAR2b-R | ATGCCTCGAGGTCGACCACCGACCGGCCCGTAC          |
| pLacZi2u-pSbWRKY22-F | TATTGGATCGGAATTCGTTAAGAAATGACTTATGTTCTCC   |
| pLacZi2u-pSbWRKY22-R | ATGCCTCGAGGTCGACGCCCCGCTTGCTAGCTATCT       |
